# Supplementary material for: Genetic Architecture of Plasma Alpha‐Aminoadipic Acid Reveals a Relationship With High‐Density Lipoprotein Cholesterol
Source: PubMed Central journal article supplement — J Am Heart Assoc. 2022 May 27;11(11):e024388. doi: 10.1161/JAHA.121.024388 (PMC9238724; doi:10.1161/jaha.121.024388), 2022-05-27

## **SUPPLEMENTAL MATERIAL**

**Appendix S1. Diabetes Prevention Program Research Group**

**DPP, DPPOS 1, DPPOS 2 & DPPOS 3A Research Group**  
(1996-2021)

**Pennington Biomedical Research Center**

**(Baton Rouge, LA)**

George A. Bray, MD\*  
Kishore M. Gadde, MD\*  
Iris W. Culbert, BSN, RN, CCRC\*\*  
Annie Chatellier, RN, CCRC\*\*  
Jennifer Arceneaux RN, BSN\*\*  
Amber Dragg RD, LDN\*\*  
Catherine M. Champagne, PhD, RD  
Crystal Duncan, LPN  
Barbara Eberhardt, RD, LDN  
Frank Greenway, MD  
Fonda G. Guillory, LPN  
April A. Herbert, RD  
Michael L. Jeffers, LPN  
Betty M. Kennedy, MPA  
Erma Levy, RD  
Monica Lockett, LPN  
Jennifer C. Lovejoy, PhD  
Laura H. Morris, BS  
Lee E. Melancon, BA, BS  
Donna H. Ryan, MD  
Deborah A. Sanford, LPN  
Kenneth G. Smith, BS, MT  
Lisa L. Smith, BS  
Julia A. St.Amant, RTR  
Richard T. Tulley, PhD  
Paula C. Vicknair, MS, RD  
Donald Williamson, PhD  
Jeffery J. Zachwieja, PhD

**University of Chicago (Chicago, IL)**

Kenneth S. Polonsky, MD\*  
Janet Tobian, MD, PhD\*  
David A. Ehrmann, MD\*  
Margaret J. Matulik, RN, BSN\*\*  
Karla A. Temple, PhD, RDN, LDN\*\*  
Bart Clark, MD  
Kirsten Czech, MS  
Catherine DeSandre, BA  
Brittnie Dotson, MS  
Ruthanne Hilbrich, RD  
Wylie McNabb, EdD  
Michael T. Quinn, PhD  
Ann R. Semenske, MS, RD

**Jefferson Medical College (Philadelphia, PA)**

Jose F. Caro, MD\*  
Pamela G. Watson, RN, ScD\*  
Barry J. Goldstein, MD, PhD\*  
Kevin Furlong, DO\*  
Kellie A. Smith, RN, MSN\*\*  
Jewel Mendoza, RN, BSN\*\*  
Wendi Wildman, RN\*\*  
Marsha Simmons, CCRP\*\*

Genine Jensen, RN  
Renee Liberoni, MPH  
John Spandorfer, MD  
Constance Pepe, MS, RD  
**University of Miami (Miami, FL)**

Richard P. Donahue, PhD\*  
Ronald B. Goldberg, MD\*  
Ronald Prineas, MD, PhD\*  
Patricia Rowe, MPA\*\*  
Anna Giannella, RD, MS\*\*  
Jeanette Calles, MEd\*\*  
Juliet Sanguily, RN\*\*  
Paul Cassanova-Romero, MD  
Sumaya Castillo-Florez, MPH  
Hermes J. Florez, MD  
Rajesh Garg, MD  
Lascelles Kirby, MS  
Olga Lara  
Carmen Larreal  
Valerie McLymont, RN  
Jadell Mendez  
Arlette Perry, PhD  
Patrice Saab, PhD  
Bertha Veciana

**The University of Texas Health Science Center**  
**(San Antonio, TX)**

Steven M. Haffner, MD, MPH\*  
Helen P. Hazuda, PhD\*  
Maria G. Montez, RN, MSHP, CDE\*\*  
Juan Isaac, RN, BSN\*\*  
Kathy Hattaway, RD, MS  
Carlos Lorenzo, MD, PhD  
Arlene Martinez, RN, BSN, CDE  
Monica Salazar  
Tatiana Walker, RD, MS, CDE

**University of Colorado (Denver, CO)**

Richard F. Hamman, MD, DrPH\*  
Dana Dabelea, MD, PhD\*  
Patricia V. Nash, MS\*\*  
Sheila C. Steinke, MS\*\*  
Lisa Testaverde, MS\*\*  
Jennifer Truong, MPH\*\*  
Denise R. Anderson, RN, BSN  
Larry B. Ballonoff, MD  
Alexis Bouffard, MA, RN, BSN  
Rebecca S. Boxer, MD, MS  
Brian Bucca OD, FAOD  
B. Ned Calonge, MD, MPH  
Lynne Delve  
Martha Farago, RN  
James O. Hill, PhD  
Shelley R. Hoyer, BS  
Tonya Jenkins, RD, CDE

\* denotes Principal Investigator

\*\* denotes Program Coordinator

**DPP, DPPOS 1, DPPOS 2 & DPPOS 3A Research Group**  
(1996-2021)

Bonnie T. Jortberg, MS, RD, CDE  
Dione Lenz, RN, BSN, CDE  
Marsha Miller, MS, RD  
Thomas Nilan, BS  
Leigh Perreault, MD  
David W. Price, MD  
Judith G. Regensteiner, PhD  
Emily B. Schroeder, MD  
Helen Seagle, MS, RD  
Carissa M. Smith, BS  
Brent VanDorsten, PhD

**Ioslin Diabetes Center (Boston, MA)**

Edward S. Horton, MD\*  
Medha Munshi, MD\*  
Kathleen E. Lawton, RN\*\*  
Catherine S. Poirier, RN, BSN\*\*  
Kati Swift, RN, BSN\*\*  
Sharon D. Jackson, CCRC, MS, RD, CDE\*\*  
Ronald A. Arky, MD  
Marybeth Bryant  
Jacqueline P. Burke, BSN  
Enrique Caballero, MD  
Karen M. Callaphan, BA  
Barbara Fagnoli, RD  
Therese Franklin  
Om P. Ganda, MD  
Ashley Guidi, BS  
Mathew Guido, BA  
Alan M. Jacobsen, MD  
Lyn M. Kula, RD  
Margaret Kocal, RN, CDE  
Lori Lambert, MS, RD, LD  
Kathleen E. Lawton, RN  
Sarah Ledbury, Med, RD  
Maureen A. Malloy, BS  
Roeland J.W. Middelbeek, MD  
Maryanne Nicosia, MS, RD  
Cathryn F. Oldmixon, RN  
Jocelyn Pan, BS, MPH  
Marizel Quitingon  
Riley Rainville, BS  
Stacy Rubtchinsky, BS  
Ellen W. Seely, MD  
Jessica Sansoucy, BS  
Dana Schweizer, BSN  
Donald Simonson, MD  
Fannie Smith, MD  
Caren G. Solomon, MD, MPH  
Jeanne Spellman, RD  
James Warram, MD

**VA Puget Sound Health Care System and  
University of Washington (Seattle, WA)**

Steven E. Kahn, MB, ChB\*

Brenda K. Montgomery, RN, BSN, CDE\*\*  
Basma Fattaleh, BA\*\*  
Celeste Colegrove, BS  
Wilfred Fujimoto, MD  
Robert H. Knopp, MD  
Edward W. Lipkin, MD  
Michelle Marr, BA  
Ivy Morgan-Taggart  
Anne Murillo, BS  
Kayla O'Neal, BS  
Dace Trence, MD  
Lonnese Taylor, RN, BS  
April Thomas, RD, MPH, CDE  
Elaine C. Tsai, MD, MPH

**University of Tennessee (Memphis, TN)**

Abbas E. Kitabchi, PhD, MD, FACP\*  
Samuel Dagogo-Jack, MD, MSc, FRCP, FACP\*  
Mary E. Murphy, RN, MS, CDE, MBA\*\*  
Laura Taylor, RN, BSN, CDE\*\*  
Jennifer Dolgoff, RN, BSN\*\*  
Ethel Faye Hampton, RN\*\*  
William B. Applegate, MD, MPH  
Michael Bryer-Ash, MD  
Debra Clark, LPN  
Sandra L. Frieson, RN  
Uzoma Ibebuogu, MD  
Raed Imseis, MD  
Helen Lambeth, RN, BSN  
Lynne C. Lichtermann, RN, BSN  
Hooman Oktaei, MD  
Harriet Ricks  
Lily M.K. Rutledge, RN, BSN  
Amy R. Sherman, RD, LD  
Clara M. Smith, RD, MHP, LDN  
Judith E. Soberman, MD  
Beverly Williams-Cleaves, MD  
Avnisha Patel, MLT  
Ebenezer A. Nyenwe, MD, FACP

**Northwestern University's Feinberg School of  
Medicine (Chicago, IL)**

Boyd E. Metzger, MD\*  
Mark E. Molitch, MD\*  
Amisha Wallia, MD\*  
Mariana K. Johnson, MS, RN\*\*  
Sarah VanderMolen, APN\*\*  
Daphne T. Adelman, MBA, RN  
Catherine Behrends  
Michelle Cook, MS  
Marian Fitzgibbon, PhD  
Mimi M. Giles, MS, RD  
Monica Hartmuller, MSN, BSN  
Cheryl K.H. Johnson, MS, RN  
Diane Larsen, BS

\* denotes Principal Investigator

\*\* denotes Program Coordinator

**DPP, DPPOS 1, DPPOS 2 & DPPOS 3A Research Group**  
(1996-2021)

Anne Lowe, BS  
Megan Lyman, BS  
David McPherson, MD  
Samsam C. Penn, BA  
Thomas Pitts, MD  
Renee Reinhart, RN, MS  
Susan Roston, RN, RD  
Pamela A. Schinleber, RN, MS  
**Massachusetts General Hospital (Boston, MA)**  
David M. Nathan, MD\*  
Charles McKittrick, BSN\*\*  
Heather Turgeon, BSN\*\*  
Mary Larkin, MSN\*\*  
Marielle Mugford, BA\*\*  
Nopporn Thangthaeng\*\*  
Fernelle Leander\*\*  
Kathy Abbott  
Ellen Anderson, MS, RD  
Laurie Bissett, MS, RD  
Kristy Bondi, BS  
Enrico Cagliero, MD  
Jose C. Florez, MD, PhD+  
Linda Delahanty, MS, RD  
Valerie Goldman, MS, RD  
Elaine Grassa  
Lindsey Gurry BSN, RN, CDE  
Kali D'Anna  
Fernelle Leandre BS  
Peter Lou, MD  
Alexandra Poulos  
Elyse Raymond, BS  
Valerie Ripley, BS  
Christine Stevens, RN  
Beverly Tseng  
**University of California-San Diego (La Jolla, CA)**  
Jerrold M. Olefsky, MD\*  
Elizabeth Barrett-Connor, MD\*  
Sunder Mudaliar, MD\*  
Maria Rosario Araneta, PhD\*  
Mary Lou Carrion-Petersen, RN, BSN\*\*  
Karen Vejvoda, RN, BSN, CDE, CCRC\*\*  
Sarah Bassiouni, MPH  
Madeline Beltran, RN, BSN, CDE  
Lauren N. Claravall, BS  
Jonalle M. Dowden, BS  
Steven V. Edelman, MD  
Pranav Garimella, MBBS  
Robert R. Henry, MD  
Javiva Horne, RD  
Marycie Lamkin, RN  
Simona Szerdi Janesch, BA  
Diana Leos  
William Polonsky, PhD

Rosa Ruiz  
Jean Smith, RN  
Jennifer Torio-Hurley  
**Columbia University (New York, NY)**  
F. Xavier Pi-Sunyer, MD\*  
Blandine Laferrere, MD, PhD\*  
Jane E. Lee, MS\*\*  
Susan Hagamen, MS, RN, CDE\*\*  
Kim Kelly-Dinham\*\*  
David B. Allison, PhD  
Nnenna Agharanya  
Nancy J. Aronoff, MS, RD  
Maria Baldo  
Jill P. Crandall, MD  
Sandra T. Foo, MD  
Jose A. Luchsinger, MD, MPH  
Carmen Pal, MD  
Kathy Parkes, RN  
Mary Beth Pena, RN  
Julie Roman  
Ellen S. Rooney, BA  
Gretchen E.H. Van Wye, MA  
Kristine A. Viscovich, ANP  
**Indiana University (Indianapolis, IN)**  
Melvin J. Prince, MD\*  
David G. Marrero, PhD\*  
Kieren J. Mather, MD\*  
Mary de Groot, PhD\*  
Susie M. Kelly, RN, CDE\*\*  
Marcia A. Jackson\*\*  
Gina McAtee\*\*  
Paula Putteney, RN\*\*  
Ronald T. Ackermann, MD  
Carolyn M. Cantrell  
Yolanda F. Dotson, BS  
Edwin S. Fineberg, MD  
Megan Fultz  
John C. Guare, PhD  
Angela Hadden  
James M. Ignaut, MA  
Marion S. Kirkman, MD  
Erin O'Kelly Phillips  
Kisha L Pinner  
Beverly D. Porter, MSN  
Paris J. Roach, MD  
Nancy D. Rowland, BS, MS  
Madelyn L. Wheeler, RD  
**Medstar Research Institute (Washington, DC)**  
Robert E. Ratner, MD\*  
Vanita Aroda, MD\*  
Michelle Magee, MD\*  
Gretchen Youssef, RD, CDE\*\*  
Sue Shapiro, RN, BSN, CCRC\*\*

\* denotes Principal Investigator  
\*\* denotes Program Coordinator

**DPP, DPPOS 1, DPPOS 2 & DPPOS 3A Research Group**  
(1996-2021)

Natalie Andon, RN  
Catherine Bavido-Arrage, MS, RD, LD  
Geraldine Boggs, MSN, RN  
Marjorie Bronsord, MS, RD, CDE  
Ernestine Brown  
Holly Love Burkott, RN  
Wayman W. Cheatham, MD  
Susan Cola  
Cindy Evans  
Peggy Gibbs  
Tracy Kellum, MS, RD, CDE  
Lilia Leon  
Milvia Lagarda  
Claresa Levatan, MD  
Milajurine Lindsay  
Asha K. Nair, BS  
Jean Park, MD  
Maureen Passaro, MD  
Angela Silverman  
Gabriel Uwaifo, MD  
Debra Wells-Thayer, NP, CDE  
Renee Wiggins, RD  
**University of Southern California/UCLA**  
**Research Center (Alhambra, CA)**  
Mohammed F. Saad, MD\*  
Karol Watson, MD\*  
Maria Budget\*\*  
Sujata Jinagouda, MD\*\*  
Medhat Botrous, MD\*\*  
Anthony Sosa\*\*  
Sameh Tadros\*\*  
Khan Akbar, MD  
Claudia Conzues  
Perpetua Magpuri  
Kathy Ngo  
Amer Rassam, MD  
Debra Waters  
Kathy Xapthalamous  
**Washington University (St. Louis, MO)**  
Julio V. Santiago, MD\*  
Samuel Dagogo-Jack, MD, MSc, FRCP, FACP\*  
Neil H. White, MD, CDE\*  
Angela L. Brown, MD\*  
Ana Santiago, RN\*\*  
Samia Das, MS, MBA, RD, LD\*\*  
Prajakta Khare-Ranade, MSc, RDN, LD\*\*  
Tamara Stich, RN, MSN, CDE\*\*  
Edwin Fisher, PhD  
Emma Hurt, RN  
Jackie Jones  
Tracy Jones, RN  
Michelle Kerr, RD  
Sherri McCowan

Lucy Ryder, RN  
Cormarie Wernimont, RD, LD  
**Johns Hopkins School of Medicine**  
**(Baltimore, MD)**  
Christopher D. Saudek, MD\*  
Sherita Hill Golden, MD, MHS, FAHA\*  
Vanessa Bradley, BA\*\*  
Emily Sullivan, MEd, RN\*\*  
Tracy Whittington, BS\*\*  
Caroline Abbas  
Adrienne Allen  
Frederick L. Brancati, MD, MHS  
Sharon Cappelli  
Jeanne M. Clark, MD  
Jeanne B. Charleston, RN, MSN  
Janice Freel  
Katherine Horak, RD  
Alicia Greene  
Dawn Jiggetts  
Delois Johnson  
Hope Joseph  
Rita Kalyani, MD, MHS  
Kimberly Loman  
Nestoras Mathioudakis, MD, MHS  
Nisa Maruthur, MD, MHS  
Henry Mosley  
John Reusing  
Richard R. Rubin, PhD  
Alafia Samuels, MD  
Thomas Shields  
Shawne Stephens  
Kerry J. Stewart, EdD  
LeeLana Thomas  
Evonne Utsey  
Paula Williamson  
**University of New Mexico (Albuquerque, NM)**  
David S. Schade, MD\*  
Karwyn S. Adams, RN, MSN\*\*  
Carolyn Johannes, RN, CDE\*\*  
Claire Hemphill, RN, BSN\*\*  
Penny Hyde, RN, BSN\*\*  
Janene L. Canady, RN, CDE\*\*  
Leslie F. Adler, PhD  
Patrick J. Boyle, MD  
Mark R. Burge, MD  
Lisa Chai, RN  
Kathleen Colleran, MD  
Ateka Fondino  
Ysela Gonzales  
Doris A. Hernandez-McGinnis  
Patricia Katz, LPN  
Carolyn King, Med  
Julia Middendorf, RN

\* denotes Principal Investigator  
\*\* denotes Program Coordinator

**DPP, DPPOS 1, DPPOS 2 & DPPOS 3A Research Group**  
(1996-2021)

Amer Rassam, MD  
Sofya Rubinchik, MD  
Willette Senter, RD  
Debra Waters, PhD

**Albert Einstein College of Medicine (Bronx, NY)**

Harry Shamoon, MD\*  
Jill Crandall, MD\*  
Janet O. Brown, RN, MPH, MSN\*\*  
Gilda Trandafirescu, MD\*\*  
Danielle Powell, MPH\*\*  
Elsie Adorno, BS  
Liane Cox, MS, RD  
Helena Duffy, MS, C-ANP  
Samuel Engel, MD  
Allison Friedler, BS  
Angela Goldstein, FNP-C, NPP, CSW  
Crystal J. Howard-Century, MA  
Jennifer Lukin, BA  
Stacey Kloiber, RN  
Nadege Longchamp, LPN  
Helen Martinez, RN, MSN, FNP-C  
Dorothy Pompei, BA  
Jonathan Scheindlin, MD  
Norica Tomuta, MD  
Elissa Violino, RD, MS  
Elizabeth A. Walker PhD, RN  
Judith Wylie-Rosett, EdD, RD  
Elise Zimmerman, RD, MS  
Joel Zonszein, MD

**University of Pittsburgh (Pittsburgh, PA)**

Rena R. Wing, PhD\*  
Trevor Orchard, MD\*  
Elizabeth Venditti, PhD\*  
Gaye Koenning, MS, RD\*\*  
M. Kaye Kramer, BSN, MPH\*\*  
Marie Smith, RN, BSN\*\*  
Susan Jeffries, RN, MSN\*\*  
Valarie Weinzierl, MPH\*\*  
Susan Barr, BS  
Catherine Benchoff  
Miriam Boraz, PhD  
Lisa Clifford, BS  
Rebecca Culyba, BS  
Marlene Frazier  
Ryan Gilligan, BS  
Stephanie Guimond, BS  
Susan Harrier, MLT  
Louann Harris, RN  
Andrea Kriska, PhD  
Qurashia Manjoo, MD  
Monica Mullen, MHP, RD  
Alicia Noel, BS  
Amy Otto, PhD

Jessica Pettigrew, CMA  
Bonny Rockette-Wagner, PhD  
Debra Rubinstein, MD  
Linda Semler, MS, RD  
Cheryl F. Smith, PhD  
Katherine V. Williams, MD, MPH  
Tara Wilson, BA

**University of Hawaii (Honolulu, HI)**

Richard F. Arakaki, MD\*  
Marjorie K. Mau, MD\*  
Renee W. Latimer, BSN, MPH\*\*  
Mae K. Isonaga, RD, MPH\*\*  
Narleen K. Baker-Ladao, BS\*\*  
Ralph Beddow, MD  
Nina E. Bermudez, MS  
Lorna Dias, AA  
Jillian Inouye, RN, PhD  
John S. Melish, MD  
Kathy Mikami, BS, RD  
Pharis Mohideen, MD  
Sharon K. Odom, RD, MPH  
Raynette U. Perry, AA  
Robin E. Yamamoto, CDE, RD

**Southwest American Indian Centers**  
**(Phoenix, AZ; Shiprock, NM; Zuni, NM)**

William C. Knowler, MD, DrPH\*  
Robert L. Hanson, MD, MPH\*  
Vallabh Shah, PhD\*  
Mary A. Hoskin, RD, MS\*\*  
Carol A. Percy, RN, MS\*\*  
Norman Coeoyate\*\*  
Camille Natewa\*\*  
Charlotte Dodge\*\*  
Alvera Enote, RD\*\*  
Harelda Anderson, LMSW\*\*  
Kelly J. Acton, MD, MPH  
Vickie L. Andre, RN, FNP  
Rosalyn Barber  
Shandiin Begay, MPH  
Peter H. Bennett, MB, FRCP  
Mary Beth Benson, RN, BSN  
Evelyn C. Bird, RD, MPH  
Brenda A. Broussard, RD, MPH, MBA, CDE  
Brian C. Bucca, OD, FAAO  
Marcella Chavez, RN, AS  
Sherron Cook  
Jeff Curtis, MD  
Tara Dacawyma  
Matthew S. Doughty, MD  
Roberta Duncan, RD  
Cyndy Edgerton, RD  
Jacqueline M. Ghahate  
Justin Glass, MD

\* denotes Principal Investigator

\*\* denotes Program Coordinator

**DPP, DPPOS 1, DPPOS 2 & DPPOS 3A Research Group**  
(1996-2021)

Martia Glass, MD  
Dorothy Gohdes, MD  
Wendy Grant, MD  
Ellie Horse  
Louise E. Ingraham, MS, RD, LN  
Merry Jackson  
Priscilla Jay  
Roylen S. Kaskalla  
Karen Kavena, ANP  
David Kessler, MD  
Kathleen M. Kobus, RNC-ANP  
Jonathan Krakoff, MD  
Jason Kurland, MD  
Catherine Manus, LPN  
Cherie McCabe  
Sara Michaels, MD  
Tina Morgan  
Yolanda Nashboo  
Julie A. Nelson, RD  
Steven Poirier, MD  
Evette Polczynski, MD  
Christopher Piromalli, DO  
Mike Reidy, MD  
Jeanine Roumain, MD, MPH  
Debra Rowse, MD  
Robert J. Roy  
Sandra Sangster, RD  
Janet Sewenemewa  
Miranda Smart  
Chelsea Spencer  
Darryl Tonemah, PhD  
Rachel Williams, FNP  
Charlton Wilson, MD  
Michelle Yazzie  
**George Washington University Biostatistics Center (DPP Coordinating Center Rockville, MD)**  
Raymond Bain, PhD\*  
Sarah Fowler, PhD\*  
Michael D. Larsen, PhD\*  
Kathleen Jablonski, PhD\*  
Marinella Temprosa, PhD\*  
Tina Brenneman\*\*  
Sharon L. Edelstein, ScM\*\*  
Solome Abebe, MS  
Julie Bamdad, MS  
Melanie Barkalow  
Joel Bethedu, MS  
Tsedenia Bezabeh, MS  
Anna Bowers  
Nicole Butler, MPH  
Jackie Callaghan  
Caitlin E. Carter, MPH

Costas Christophi, PhD  
Gregory M. Dwyer, MPH  
Mary Foulkes, PhD  
Yuping Gao  
Robert Gooding  
Adrienne Gottlieb, MS  
Kristina L. Grimes  
Nisha Grover-Fairchild, MPH  
Lori Haffner, MS  
Heather Hoffman, PhD  
Steve Jones  
Tara L. Jones  
Richard Katz, MD  
Preethy Kolinjivadi, MS  
John M. Lachin, ScD  
Yong Ma, PhD  
Pamela Mucik  
Robert Orlosky  
Qing Pan, PhD  
Susan Reamer, MS  
James Rochon, PhD  
Alla Sapozhnikova, PhD  
Hanna Sherif, MS  
Charlotte Stimpson  
Ashley Hogan Tjaden, MPH  
Fredricka Walker-Murray  
**Lifestyle Resource Core**  
Elizabeth M. Venditti, PhD\*  
Andrea M. Kriska, PhD  
Linda Semler, MS, RD, LDN  
Valerie Weinzierl, MPH  
**Central Biochemistry Laboratory (Seattle, WA)**  
Santica Marcovina, PhD, ScD\*  
F. Alan Aldrich\*\*  
Jessica Harting\*\*  
John Albers, PhD  
Greg Strylewicz, PhD  
**Advanced Research Diagnostic Laboratory (Minneapolis, MN)**  
Anthony Killeen, MD, PhD\*  
Deanna Gabrielson\*\*  
**NIH/NIDDK (Bethesda, MD)**  
R. Eastman, MD  
Judith Fradkin, MD  
Sanford Garfield, PhD  
Christine Lee, MD, MS  
**Centers for Disease Control & Prevention (Atlanta, GA)**  
Edward Gregg, PhD  
Ping Zhang, PhD  
**Carotid Ultrasound**  
Dan O'Leary, MD\*  
Gregory Evans

\* denotes Principal Investigator

\*\* denotes Program Coordinator



**DPP, DPPOS 1, DPPOS 2 & DPPOS 3A Research Group**  
(1996-2021)

**Coronary Artery Calcification Reading Center**

Matthew Budoff, MD  
Chris Dailing

**CT Scan Reading Center**

Elizabeth Stamm, MD\*

**Dual Energy X-ray Absorptiometry Reading Center (San Francisco, CA)**

Ann Schwartz, PhD  
Caroline Navy  
Lisa Palermo, MS

**Epidemiological Cardiology Research Center-Epicare (Winston-Salem, NC)**

Pentti Rautaharju, MD, PhD\*  
Ronald J. Prineas, MD, PhD\*\*  
Elsayed Z. Soliman, MD\*  
Teresa Alexander  
Charles Campbell, MS  
Sharon Hall  
Yabing Li, MD  
Margaret Mills

Nancy Pemberton, MS  
Farida Rautaharju, PhD  
Zhuming Zhang, MD  
Julie Hu, MSc  
Susan Hensley, BS  
Lisa Keasler  
Tonya Taylor

**Fundus Photo Reading Center (Madison, WI)**

Ronald Danis, MD\*  
Matthew Davis, MD\*  
Larry Hubbard\*  
Barbara Blodi, MD\*  
Ryan Endres\*\*  
Deborah Elsas\*\*  
Samantha Johnson\*\*  
Dawn Myers\*\*  
Nancy Barrett  
Heather Baumhauer  
Wendy Benz  
Holly Cohn  
Ellie Corkery  
Kristi Dohm  
Amitha Domalpally, MD, PhD  
Vonnie Gama  
Anne Goulding  
Andy Ewen  
Cynthia Hurtenbach  
Daniel Lawrence  
Kyle McDaniel  
Jeong Pak  
James Reimers  
Ruth Shaw  
Maria Swift

\* denotes Principal Investigator

\*\* denotes Program Coordinator

Pamela Vargo, CRA  
Sheila Watson

**Neurocognitive Assessment Group**

Jose A. Luchsinger, MD, MPH  
Jennifer Manly, PhD

**Nutrition Coding Center (Columbia, SC)**

Elizabeth Mayer-Davis, PhD\*  
Robert R. Moran, PhD\*\*

**Quality of Well-Being Center (La Jolla, CA)**

Ted Ganiats, MD\*  
Kristin David, MHP\*  
Andrew J. Sarkin, PhD\*  
Erik Groessl, PhD  
Naomi Katzir  
Helen Chong, MA

**University of Michigan (Ann Arbor, MI)**

William H. Herman, MD, MPH  
Michael Brändle, MD, MS  
Morton B. Brown, PhD

**Genetics Working Group**

Jose C. Florez, MD, PhD<sup>1,2</sup>  
David Altshuler, MD, PhD<sup>1,2</sup>  
Liana K. Billings, MD<sup>1</sup>  
Ling Chen, MS<sup>1</sup>  
Maegan Harden, BS<sup>2</sup>  
Robert L. Hanson, MD, MPH<sup>3</sup>  
William C. Knowler, MD, DrPH<sup>3</sup>  
Toni I. Pollin, PhD<sup>4</sup>  
Alan R. Shuldiner, MD<sup>4</sup>  
Kathleen Jablonski, PhD<sup>5</sup>  
Paul W. Franks, PhD, MPhil, MS<sup>6,7,8</sup>  
Marie-France Hivert, MD<sup>1</sup>

1=Massachusetts General Hospital

2=Broad Institute

3=NIDDK

4=University of Maryland

5=Coordinating Center

6=Lund University, Sweden

7=Umeå University, Sweden

8=Harvard School of Public Health

**Table S1.** Characteristics of the study participants included for genome-wide association analysis of plasma 2-AAA

| <b>TRAIT</b>               | <b>FHS</b> | <b>DPP</b>              | <b>JHS</b>          | <b>SWMHS</b> |
|----------------------------|------------|-------------------------|---------------------|--------------|
| <b>N</b>                   | 1,452      | 1,612                   | 1,884               | 508          |
| <b>ANCESTRY</b>            | European   | Mixed*                  | African<br>American | Chinese      |
| <b>N FEMALE (%)</b>        | 731 (50)   | 1054 (65.4)             | 1160 (61.6)         | 376 (74)     |
| <b>AGE, MEAN (SD)</b>      | 55.6 (9.6) | 53.4 (10.3)             | 56.4 (12.7)         | 56.8 (9.1)   |
| <b>BMI, MEAN (SD)</b>      | 27.8 (4.9) | 33.4 (6.2)              | 31.8 (7.3)          | 24.9 (3.5)   |
| <b>DIABETES N (%)</b>      | 82 (5.6)   | 0 (0%)                  | 457 (24.3)          | 31 (6.1)     |
| <b>CHD N (%)</b>           | 85 (5.8)   | 238 (16.1) <sup>†</sup> | 216 (11.5)          | 21 (4.1)     |
| <b>CURRENT SMOKING (%)</b> | 257 (17.7) | 103 (6.4) <sup>‡</sup>  | 245 (13.2)          | 91 (17.9)    |

\* European American (70%), African American (19%), Asian American (4%), Other (7%)

<sup>†</sup>132 of 1612 missing baseline status for history of CHD

<sup>‡</sup>1194 of 1612 missing baseline smoking status

**Table S2.**

SNPs significantly associated with plasma 2-AAA at  $p < 5 \times 10^{-4}$  with consistent direction of effect in at least 3 of the 4 studies analyzed through trans-ethnic meta-analysis. Beta represents the effect per allele on 1SD of normalized 2-AAA values.

**Table S3.**

PheWAS of 2-AAA: European Ancestry; cases for each phenotype defined by individual having 2 or more instances of a given Phecode in the HER

**Table S4.**

PheWAS of 2-AAA: African Ancestry; cases for each phenotype defined by individual having 2 or more instances of a given Phecode in the EHR

**Table S5.**

Mendelian Randomization to test effect of 2-AAA genetic instrument on cardiometabolic outcomes

**Table S6.**

Reverse Mendelian Randomization to test effect of cardiometabolic disease genetic instrument on plasma 2-AAA

**Table S7.**

Multi-variable MR to test independence of the effects of 2-AAA and insulin on HDL

**Figure S1.** Manhattan plots of 2-AAA GWAS in the individual studies.

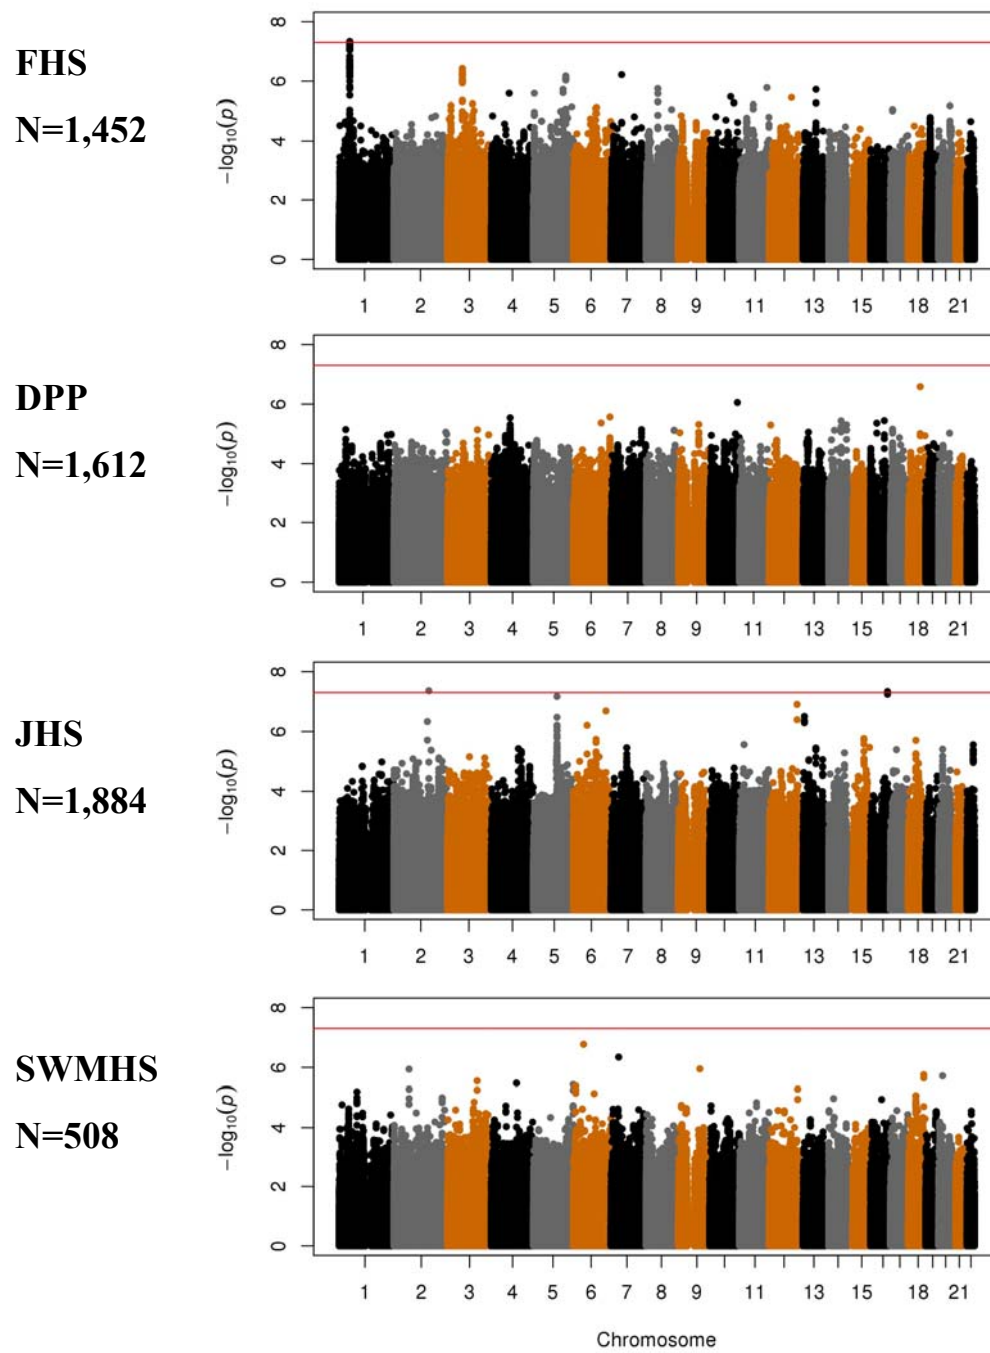

Supplement: JAH3-11-e024388-s001.pdf [file JAH3-11-e024388-s001.pdf]
